# Supplementary material
Source: publisher site journal article supplement (https://www.dovepress.com/article/389567)
Supplement: Supplementary file 1 [file get_supplementary_file.php]

# Appendix A

**PubMed Search Strategy:**

| PATIENT | CONTEXT |
| --- | --- |
| “stroke rehabilitation”[mh] OR  “stroke rehabilitation”[tiab] OR  “stroke rehab*”[tiab] OR  “post stroke rehab”[tw] OR  “post stroke rehabilitation”[tw] | “quality of health care”[mh:noexp] OR  “clinical competence”[mh:noexp] OR  “guideline adherence”[mh:noexp] OR  “outcomes and process assessment (health care)”[mh] OR  “peer review, health care”[mh:noexp] OR  “professional review organizations”[mh:noexp] OR  “program evaluation”[mh] OR  “quality assurance”[mh] OR  “total quality management”[mh:noexp] OR  “quality improvement”[mh] OR  “quality indicators, health care”[mh] OR  “quality of healthcare”[tiab] OR  “quality of health care”[tiab] OR  “clinical competence”[ tiab] OR  “guideline adherence”[ tiab] OR  “outcomes and process assessment (health care)”[ tiab] OR  “peer review, health care”[ tiab] OR  “professional review organizations”[tiab] OR  “program evaluation”[ tiab] OR  “quality assurance”[ tiab] OR  “total quality management”[ tiab] OR  “quality improvement”[tiab] OR  “model of care”[tiab] OR  “models of care”[tiab] OR  “continuous improvement”[tiab] OR  “quality indicator*”[tiab] OR  “quality measure*”[tiab] OR  “quality intervention*”[tiab] OR  “quality dimension*”[tiab] OR  “quality assessment”[tiab] |

**CINAHL Search Strategy:**

| PATIENT | CONTEXT |
| --- | --- |
| TI “Stroke rehabilitation” OR  AB “Stroke rehabilitation” OR  TI “stroke rehab*” OR  AB “stroke rehab*” OR  TX “post stroke rehab” OR  TX “post stroke rehabilitation” | MH “quality of health care” OR  MH “clinical competence” OR  MH “guideline adherence” OR  MH “process assessment” OR  MH **“outcomes (health care) +** ”OR  MH “**quality assurance +**” OR  TI “quality of healthcare” OR  AB “quality of healthcare” OR  TI “quality of health care” OR  AB “quality of health care” OR  TI “clinical competence” OR  AB “clinical competence” OR  TI “guideline adherence” OR  AB “guideline adherence” OR  TI “process assessment” OR  AB “process assessment” OR  TI **“**outcomes (health care) ”OR  AB “outcomes (health care) ”OR  TI “quality assurance” OR  AB “quality assurance” OR  TI **“**outcomes assessment ”OR  AB “outcomes assessment ”OR  TI “peer review, health care” OR  AB “peer review, health care” OR  TI “professional review organizations” OR  AB “professional review organizations” OR  TI “program evaluation” OR  AB “program evaluation” OR  TI “total quality management” OR  AB “total quality management” OR  TI “quality improvement” OR  AB “quality improvement” OR  TI “quality indicators, health care” OR  AB “quality indicators, health care” OR  TI “model of care” OR  AB “model of care” OR  TI “continuous improvement” OR  AB “continuous improvement” OR  TI “quality indicator*” OR  AB “quality indicator*” OR  TI “quality measure*” OR  AB “quality measure*” OR  TI “quality intervention*” OR  AB “quality intervention*” OR  TI “quality improvement” OR  AB “quality improvement” OR  TI “quality dimension*” OR  AB “quality dimension*” OR  TI “quality assessment” OR  AB “quality assessment” |

**Embase Search Strategy:**

| Stroke | Improvements |
| --- | --- |
| “stroke rehabilitation”/de OR  “stroke rehabilitation”:ti,ab OR  “stroke rehab*”:ti,ab OR  “post stroke rehab”:ti,ab OR  “post stroke rehabilitation”:ti,ab | “health care quality”/de OR  “clinical effectiveness”/de OR  “clinical indicator”/de OR  “performance measurement system”/de OR  “practice guideline”/de OR  “program evaluation”/de OR  “peer review organization”/de OR  “quality control”/de OR  “total quality management”/de OR  “health care quality”:ti,ab OR  “clinical effectiveness”:ti,ab OR  “clinical indicator”:ti,ab OR  “performance measurement system”:ti,ab OR  “practice guideline”:ti,ab OR  “program evaluation”:ti,ab OR  “peer review organization”:ti,ab OR  “quality control”:ti,ab OR  “total quality management”:ti,ab OR  “quality indicators, health care”:ti,ab OR  “quality improvement”:ti,ab OR  “quality assurance”:ti,ab OR  “outcomes and process assessment (health care)”:ti,ab OR  “model of care”:ti,ab OR  “models of care”:ti,ab OR  “quality of healthcare”:ti,ab OR  “quality of health care”:ti,ab OR  “continuous improvement”:ti,ab OR  “quality indicator*”:ti,ab OR  “quality measure*”:ti,ab OR  “quality intervention*”:ti,ab OR  “quality dimension*”:ti,ab OR  “quality assessment”:ti,ab |
